# Supplementary material for: Circulating matrix metalloproteinases and tissue metalloproteinase inhibitors in patients with idiopathic pulmonary fibrosis in the multicenter IPF-PRO Registry cohort
Source: Springer Nature journal article supplement (doi:10.1186/s12890-020-1103-4), 2020-03-14
Supplement: MOESM1 [file 17799278]

**Additional file 1.** Tertile cutpoints for disease severity metrics.

| <b>Metric</b>                | <b>Lower Cutpoint</b> | <b>Upper Cutpoint</b> |
|------------------------------|-----------------------|-----------------------|
| CPI                          | 49.40                 | 58.39                 |
| FVC % predicted              | 63.70                 | 76.76                 |
| DL <sub>CO</sub> % predicted | 35.20                 | 46.95                 |

CPI, composite physiologic index; DL<sub>CO</sub>, diffusing capacity of the lungs for carbon monoxide; FVC, forced vital capacity.
