# Supplementary material for: Circulating matrix metalloproteinases and tissue metalloproteinase inhibitors in patients with idiopathic pulmonary fibrosis in the multicenter IPF-PRO Registry cohort
Source: Springer Nature journal article supplement (doi:10.1186/s12890-020-1103-4), 2020-03-14
Supplement: MOESM2 [file 17799278]

**Additional file 2.** MMP and TIMP concentrations (pg/mL) in patients with IPF versus the control population.

| <b>Protein</b> | <b>Population</b> | <b>N</b> | <b>Min</b> | <b>25th percentile</b> | <b>Median</b> | <b>75th percentile</b> | <b>Max</b> | <b>Mean</b> | <b>Standard deviation</b> |
|----------------|-------------------|----------|------------|------------------------|---------------|------------------------|------------|-------------|---------------------------|
| <b>MMP1</b>    | IPF               | 300      | 0.08       | 17.91                  | 32.37         | 55.81                  | 387.39     | 43.54       | 44.10                     |
|                | Control           | 100      | 0.08       | 8.34                   | 19.42         | 35.27                  | 139.64     | 25.33       | 26.48                     |
| <b>MMP2</b>    | IPF               | 300      | 236.90     | 26067.67               | 30926.62      | 37076.40               | 191694.82  | 32555.21    | 14415.48                  |
|                | Control           | 100      | 106.21     | 20288.37               | 25064.32      | 30903.38               | 48623.54   | 25808.48    | 8409.41                   |
| <b>MMP3</b>    | IPF               | 300      | 1552.25    | 4379.23                | 6310.00       | 8730.98                | 83631.97   | 7994.32     | 8096.36                   |
|                | Control           | 100      | 1568.54    | 3776.16                | 5252.57       | 7909.93                | 24830.73   | 6185.21     | 3525.26                   |
| <b>MMP7</b>    | IPF               | 300      | 69.05      | 174.53                 | 237.63        | 295.73                 | 1100.09    | 259.06      | 128.78                    |
|                | Control           | 100      | 17.48      | 152.72                 | 195.96        | 249.38                 | 602.93     | 215.07      | 94.25                     |
| <b>MMP8</b>    | IPF               | 300      | 0.80       | 36.56                  | 53.61         | 79.40                  | 5417.52    | 88.26       | 316.60                    |
|                | Control           | 100      | 0.40       | 13.21                  | 24.10         | 38.42                  | 575.63     | 34.91       | 62.94                     |
| <b>MMP9</b>    | IPF               | 300      | 1158.97    | 3481.40                | 5586.75       | 9086.73                | 95513.71   | 7507.49     | 7742.25                   |
|                | Control           | 100      | 932.56     | 1951.24                | 2827.69       | 4136.99                | 8816.96    | 3203.14     | 1735.13                   |
| <b>MMP12</b>   | IPF               | 300      | 0.26       | 40.58                  | 69.22         | 110.46                 | 505.53     | 82.14       | 62.65                     |
|                | Control           | 100      | 0.26       | 26.25                  | 57.01         | 86.79                  | 436.81     | 65.90       | 62.21                     |
| <b>MMP13</b>   | IPF               | 300      | 0.14       | 29.60                  | 45.83         | 71.47                  | 267.87     | 53.79       | 37.84                     |
|                | Control           | 100      | 0.42       | 16.42                  | 28.60         | 40.03                  | 538.16     | 36.27       | 55.70                     |

|              |         |     |           |           |           |           |            |           |           |
|--------------|---------|-----|-----------|-----------|-----------|-----------|------------|-----------|-----------|
| <b>TIMP1</b> | IPF     | 300 | 124656.12 | 375017.66 | 451095.35 | 550093.92 | 2542100.00 | 485624.83 | 204982.95 |
|              | Control | 100 | 188139.04 | 276633.79 | 315033.43 | 397911.11 | 575475.47  | 337874.12 | 88977.95  |
| <b>TIMP2</b> | IPF     | 300 | 16688.30  | 124691.26 | 140383.81 | 162050.16 | 461355.33  | 146066.92 | 39837.75  |
|              | Control | 100 | 63550.51  | 114663.24 | 132096.89 | 152272.27 | 298072.74  | 139149.69 | 39189.23  |
| <b>TIMP4</b> | IPF     | 300 | 391.49    | 3203.04   | 4100.75   | 5191.03   | 13549.28   | 4392.84   | 1735.13   |
|              | Control | 100 | 1359.12   | 2730.31   | 3435.03   | 4115.11   | 13674.65   | 3674.56   | 1648.70   |
