# Supplementary material for: Circulating matrix metalloproteinases and tissue metalloproteinase inhibitors in patients with idiopathic pulmonary fibrosis in the multicenter IPF-PRO Registry cohort
Source: Springer Nature journal article supplement (doi:10.1186/s12890-020-1103-4), 2020-03-14
Supplement: MOESM3 [file 17799278]

**Additional file 3.** Median (first quartile, third quartile) concentration for each MMP/TIMP stratified by tertile of FVC % predicted, DL<sub>CO</sub> % predicted, and CPI.

| Protein<br>(pg/mL) | FVC % predicted              |                              |                              | DL <sub>CO</sub> % predicted |                              |                              | CPI                          |                              |                              |
|--------------------|------------------------------|------------------------------|------------------------------|------------------------------|------------------------------|------------------------------|------------------------------|------------------------------|------------------------------|
|                    | Tertile 1                    | Tertile 2                    | Tertile 3                    | Tertile 1                    | Tertile 2                    | Tertile 3                    | Tertile 1                    | Tertile 2                    | Tertile 3                    |
| <b>MMP1</b>        | 39.07 (23.20-62.18)          | 26.14 (12.75-51.78)          | 30.79 (15.07-54.66)          | 38.42 (23.11-67.49)          | 29.48 (15.71-50.21)          | 30.92 (11.89-51.66)          | 30.78 (12.76-49.74)          | 30.16 (15.08-52.00)          | 39.07 (23.20-67.49)          |
| <b>MMP2</b>        | 30344.02 (26053.51-37069.72) | 31586.16 (27418.90-37921.57) | 29794.79 (25257.21-36554.29) | 30923.93 (26624.82-36865.93) | 31459.37 (26694.17-38664.93) | 29374.21 (24883.76-36306.47) | 29634.31 (23732.83-36377.50) | 31568.39 (26733.15-37039.57) | 30923.93 (26834.08-37845.31) |
| <b>MMP3</b>        | 6531.08 (4651.99-8300.57)    | 6332.08 (3938.06-9056.61)    | 6080.23 (4380.26-9176.99)    | 6476.34 (4483.32-9806.68)    | 6349.97 (4114.35-8837.38)    | 6040.09 (4400.39-8290.76)    | 6198.11 (4414.60-8531.70)    | 6272.61 (4024.62-7762.02)    | 6476.34 (4548.86-10282.81)   |
| <b>MMP7</b>        | 247.85 (203.14-325.19)       | 224.20 (165.39-328.87)       | 223.20 (173.68-277.17)       | 258.21 (212.56-332.91)       | 226.76 (169.75-286.00)       | 213.78 (165.74-268.95)       | 215.05 (160.51-266.38)       | 229.54 (170.35-295.73)       | 258.21 (211.81-335.45)       |
| <b>MMP8</b>        | 60.61 (39.79-95.14)          | 49.24 (31.66-79.04)          | 55.07 (38.85-68.42)          | 62.92 (44.39-113.75)         | 51.20 (36.04-67.77)          | 48.07 (34.53-68.69)          | 49.87 (34.92-62.58)          | 48.42 (35.62-72.89)          | 63.81 (42.64-113.75)         |
| <b>MMP9</b>        | 7076.01 (3656.02-10058.80)   | 5491.60 (3337.91-8702.68)    | 4887.53 (3446.82-8150.05)    | 6919.93 (3825.67-10324.59)   | 5723.32 (3436.55-8855.98)    | 4809.11 (3238.35-7539.73)    | 4812.21 (3282.68-7666.10)    | 5211.92 (3157.26-8190.94)    | 7523.44 (4517.84-12327.98)   |
| <b>MMP12</b>       | 81.78 (49.16-124.95)         | 51.95 (29.46-105.18)         | 62.10 (40.96-102.61)         | 76.44 (45.87-135.70)         | 64.75 (40.85-100.88)         | 60.38 (33.93-96.55)          | 60.08 (35.76-96.46)          | 64.22 (38.09-105.61)         | 77.91 (47.12-131.95)         |

|              |                                    |                                    |                                    |                                    |                                    |                                    |                                    |                                    |                                    |
|--------------|------------------------------------|------------------------------------|------------------------------------|------------------------------------|------------------------------------|------------------------------------|------------------------------------|------------------------------------|------------------------------------|
| <b>MMP13</b> | 55.09 (37.77-84.82)                | 39.99 (19.17-64.29)                | 46.54 (30.45-65.78)                | 54.85 (34.23-85.81)                | 44.27 (30.29-64.61)                | 39.72 (23.68-68.25)                | 40.93 (26.59-67.70)                | 42.58 (27.55-61.13)                | 55.38 (37.30-87.55)                |
| <b>TIMP1</b> | 453511.85<br>(387387.95-535856.35) | 446308.00<br>(357390.30-562568.85) | 452813.85<br>(367331.35-525346.05) | 435606.25<br>(366875.90-535856.35) | 446919.50<br>(357212.90-570017.90) | 471149.40<br>(386315.60-534450.30) | 466500.36<br>(389536.37-525346.10) | 443417.57<br>(353860.36-568303.27) | 444377.46<br>(374224.59-548099.39) |
| <b>TIMP2</b> | 139618.80<br>(125239.40-155392.85) | 143464.00<br>(123742.05-167573.20) | 139869.70<br>(125058.45-159254.80) | 141497.90<br>(125518.70-160997.40) | 138877.30<br>(125066.70-167393.50) | 140357.90<br>(124612.40-158020.90) | 139410.98<br>(124100.43-156414.57) | 139842.16<br>(124458.15-163596.04) | 141645.31<br>(126452.64-162541.19) |
| <b>TIMP4</b> | 4235.14<br>(3355.91-5372.85)       | 3948.40<br>(2960.04-5132.03)       | 4256.79<br>(3172.93-5058.68)       | 4579.19<br>(3282.03-5563.62)       | 3972.20<br>(3157.18-5227.46)       | 3801.53<br>(3161.46-4825.90)       | 3920.26<br>(3175.07-4982.71)       | 3868.34<br>(2960.62-4907.14)       | 4714.83<br>(3406.45-5824.77)       |

---

CPI, composite physiologic index; DL<sub>CO</sub>, diffusing capacity of the lungs for carbon monoxide; FVC, forced vital capacity.
