# Supplementary material for: Circulating matrix metalloproteinases and tissue metalloproteinase inhibitors in patients with idiopathic pulmonary fibrosis in the multicenter IPF-PRO Registry cohort
Source: Springer Nature journal article supplement (doi:10.1186/s12890-020-1103-4), 2020-03-14
Supplement: MOESM4 [file 17799278]

**Additional file 4.** Association of MMPs and TIMPs with measures of IPF severity, adjusted for anti-fibrotic treatment.

| Protein      | Association with FVC %<br>predicted |                                | Association with DL <sub>CO</sub> %<br>predicted |                                | Association with CPI  |                                |
|--------------|-------------------------------------|--------------------------------|--------------------------------------------------|--------------------------------|-----------------------|--------------------------------|
|              | Estimated effect* (β)               | Corrected p-value <sup>†</sup> | Estimated effect* (β)                            | Corrected p-value <sup>†</sup> | Estimated effect* (β) | Corrected p-value <sup>†</sup> |
| <b>MMP1</b>  | -0.69                               | 0.7391                         | -1.79                                            | 0.2615                         | 1.27                  | 0.3376                         |
| <b>MMP2</b>  | 4.86                                | 0.3012                         | -1.38                                            | 0.7044                         | 0.08                  | 0.9725                         |
| <b>MMP3</b>  | 2.34                                | 0.7391                         | -4.01                                            | 0.2615                         | 2.26                  | 0.4278                         |
| <b>MMP7</b>  | -10.49                              | 0.1465                         | <b>-13.63</b>                                    | <b>0.0080</b>                  | <b>11.20</b>          | <b>0.0049</b>                  |
| <b>MMP8</b>  | -6.49                               | 0.1465                         | <b>-6.06</b>                                     | <b>0.0359</b>                  | <b>5.57</b>           | <b>0.0140</b>                  |
| <b>MMP9</b>  | -8.14                               | 0.1359                         | -3.97                                            | 0.2615                         | <b>5.44</b>           | <b>0.0260</b>                  |
| <b>MMP12</b> | -3.91                               | 0.1942                         | <b>-5.53</b>                                     | <b>0.0084</b>                  | <b>4.42</b>           | <b>0.0073</b>                  |
| <b>MMP13</b> | -2.97                               | 0.2547                         | <b>-6.36</b>                                     | <b>0.0006</b>                  | <b>4.71</b>           | <b>0.0017</b>                  |
| <b>TIMP1</b> | -1.48                               | 0.8237                         | 0.22                                             | 0.9684                         | 1.37                  | 0.8309                         |
| <b>TIMP2</b> | -3.54                               | 0.7391                         | -6.82                                            | 0.4064                         | 5.61                  | 0.4278                         |
| <b>TIMP4</b> | -2.83                               | 0.7391                         | <b>-11.90</b>                                    | <b>0.0257</b>                  | <b>8.10</b>           | <b>0.0460</b>                  |

\*Estimated effect (β) is the estimated difference in disease severity measure per 10-fold increase in protein concentration, as determined by linear regression.

<sup>†</sup>p-value determined by linear regression corrected for multiplicity using the Benjamini-Hochberg method to control the false discovery rate at 5%.

CPI, composite physiologic index; DL<sub>CO</sub>, diffusing capacity of the lungs for carbon monoxide; FVC, forced vital capacity.
