# Supplementary material for: Circulating matrix metalloproteinases and tissue metalloproteinase inhibitors in patients with idiopathic pulmonary fibrosis in the multicenter IPF-PRO Registry cohort
Source: Springer Nature journal article supplement (doi:10.1186/s12890-020-1103-4), 2020-03-14
Supplement: MOESM5 [file 17799278]

**Additional file 5.** Mean (standard deviation) log<sub>10</sub> MMP and TIMP concentrations in the IPF and control populations stratified by smoking status at enrollment (current/past smoker vs. never smoker).

| Protein<br>(pg/mL)* | Control                          |                        | IPF                               |                        |
|---------------------|----------------------------------|------------------------|-----------------------------------|------------------------|
|                     | Current/Past<br>Smoker<br>(N=68) | Never Smoker<br>(N=32) | Current/Past<br>Smoker<br>(N=204) | Never Smoker<br>(N=96) |
| <b>MMP1</b>         | 1.07 (0.82)                      | 1.08 (0.64)            | 1.38 (0.67)                       | 1.42 (0.53)            |
| <b>MMP2</b>         | 4.36 (0.32)                      | 4.34 (0.38)            | 4.45 (0.32)                       | 4.49 (0.12)            |
| <b>MMP3</b>         | 3.74 (0.22)                      | 3.72 (0.25)            | 3.82 (0.27)                       | 3.77 (0.25)            |
| <b>MMP7</b>         | 2.32 (0.17)                      | 2.24 (0.24)            | 2.38 (0.18)                       | 2.35 (0.20)            |
| <b>MMP8</b>         | 1.16 (0.76)                      | 1.08 (0.85)            | 1.75 (0.35)                       | 1.73 (0.20)            |
| <b>MMP9</b>         | 3.45 (0.23)                      | 3.44 (0.23)            | 3.77 (0.30)                       | 3.75 (0.29)            |
| <b>MMP12</b>        | 1.63 (0.49)                      | 1.61 (0.57)            | 1.75 (0.47)                       | 1.80 (0.40)            |
| <b>MMP13</b>        | 1.38 (0.38)                      | 1.45 (0.33)            | 1.58 (0.49)                       | 1.56 (0.55)            |
| <b>TIMP1</b>        | 5.51 (0.11)                      | 5.51 (0.12)            | 5.66 (0.15)                       | 5.66 (0.13)            |
| <b>TIMP2</b>        | 5.13 (0.11)                      | 5.12 (0.12)            | 5.14 (0.12)                       | 5.16 (0.10)            |
| <b>TIMP4</b>        | 3.53 (0.17)                      | 3.55 (0.15)            | 3.60 (0.19)                       | 3.64 (0.14)            |

\*Results of t-tests for differences in MMP/TIMP concentrations between current/past smokers vs never smokers within the control and IPF populations, respectively, indicated no statistically significant differences.
