# Supplementary material for: Circulating matrix metalloproteinases and tissue metalloproteinase inhibitors in patients with idiopathic pulmonary fibrosis in the multicenter IPF-PRO Registry cohort
Source: Springer Nature journal article supplement (doi:10.1186/s12890-020-1103-4), 2020-03-14
Supplement: MOESM6 [file 17799278]

**Additional file 6.** Mean (standard deviation) log<sub>10</sub> MMP and TIMP concentrations in patients with IPF with or without clinically significant emphysema on CT scan as assessed by the enrolling physician.

| <b>Protein<br/>(pg/mL)</b> | <b>IPF</b>                                                                    |                                                                               | <b>P-value*</b> |
|----------------------------|-------------------------------------------------------------------------------|-------------------------------------------------------------------------------|-----------------|
|                            | <b>Clinically Significant<br/>Emphysema Present on CT<br/>scan<br/>(N=31)</b> | <b>Clinically Significant<br/>Emphysema Absent on CT<br/>scan<br/>(N=269)</b> |                 |
| <b>MMP1</b>                | 1.39 (0.76)                                                                   | 1.40 (0.61)                                                                   | 0.9388          |
| <b>MMP2</b>                | 4.56 (0.21)                                                                   | 4.45 (0.28)                                                                   | 0.0478          |
| <b>MMP3</b>                | 3.91 (0.34)                                                                   | 3.79 (0.25)                                                                   | 0.0706          |
| <b>MMP7</b>                | 2.42 (0.15)                                                                   | 2.36 (0.19)                                                                   | 0.0991          |
| <b>MMP8</b>                | 1.80 (0.37)                                                                   | 1.74 (0.32)                                                                   | 0.2952          |
| <b>MMP9</b>                | 3.82 (0.35)                                                                   | 3.76 (0.29)                                                                   | 0.2811          |
| <b>MMP12</b>               | 1.71 (0.53)                                                                   | 1.77 (0.44)                                                                   | 0.5118          |
| <b>MMP13</b>               | 1.45 (0.77)                                                                   | 1.59 (0.47)                                                                   | 0.1596          |
| <b>TIMP1</b>               | 5.68 (0.15)                                                                   | 5.66 (0.15)                                                                   | 0.3108          |
| <b>TIMP2</b>               | 5.17 (0.09)                                                                   | 5.15 (0.12)                                                                   | 0.2283          |
| <b>TIMP4</b>               | 3.66 (0.18)                                                                   | 3.60 (0.18)                                                                   | 0.1226          |

\*Results of t-tests for differences in MMP/TIMP concentrations between IPF patients with vs. without clinically significant emphysema on CT scan.
