# Supplementary material for: Circulating matrix metalloproteinases and tissue metalloproteinase inhibitors in patients with idiopathic pulmonary fibrosis in the multicenter IPF-PRO Registry cohort
Source: Springer Nature journal article supplement (doi:10.1186/s12890-020-1103-4), 2020-03-14
Supplement: MOESM7 [file 17799278]

**Additional file 7.** Model performance in the training (cross-validation) set for baseline FVC % predicted, DL<sub>CO</sub> % predicted and CPI.

|              | <b>FVC % predicted</b> |                      | <b>DL<sub>CO</sub> % predicted</b> |                      | <b>CPI</b>  |                      |
|--------------|------------------------|----------------------|------------------------------------|----------------------|-------------|----------------------|
|              | <b>RMSE</b>            | <b>R<sup>2</sup></b> | <b>RMSE</b>                        | <b>R<sup>2</sup></b> | <b>RMSE</b> | <b>R<sup>2</sup></b> |
| <b>PLS</b>   | 11.43                  | 0.16                 | 11.43                              | 0.16                 | 11.11       | 0.11                 |
| <b>PLR</b>   | 16.60                  | 0.07                 | 14.39                              | 0.11                 | 11.16       | 0.11                 |
| <b>SVM</b>   | 16.33                  | 0.07                 | 14.23                              | 0.11                 | 11.03       | 0.12                 |
| <b>KNN</b>   | 16.51                  | 0.05                 | 14.83                              | 0.04                 | 11.23       | 0.10                 |
| <b>RPART</b> | 16.67                  | 0.07                 | 14.68                              | 0.06                 | 10.94       | 0.13                 |
| <b>RF</b>    | 16.32                  | 0.07                 | 14.02                              | 0.12                 | 10.95       | 0.12                 |

KNN, K-nearest neighbors; PLR, penalized logistic regression; PLS, partial least squares; RF, random forests; RMSE, root mean squared error; RPART, recursive partitioning; SVM, support vector machines.
