# Supplementary material for: Circulating matrix metalloproteinases and tissue metalloproteinase inhibitors in patients with idiopathic pulmonary fibrosis in the multicenter IPF-PRO Registry cohort
Source: Springer Nature journal article supplement (doi:10.1186/s12890-020-1103-4), 2020-03-14
Supplement: MOESM8 [file 17799278]

**Additional file 8.** Model performance in the test set for baseline FVC % predicted, DL<sub>CO</sub> % predicted and CPI.

|              | FVC % predicted |                | DL <sub>CO</sub> % predicted |                | CPI  |                |
|--------------|-----------------|----------------|------------------------------|----------------|------|----------------|
|              | RMSE            | R <sup>2</sup> | RMSE                         | R <sup>2</sup> | RMSE | R <sup>2</sup> |
| <b>PLS</b>   | 26.19           | 0.02           | 16.70                        | <0.01          | 9.61 | <0.01          |
| <b>PLR</b>   | 15.51           | 0.06           | 11.74                        | <0.01          | 9.63 | 0.01           |
| <b>SVM</b>   | 16.10           | <0.01          | 10.48                        | <0.01          | 8.99 | 0.04           |
| <b>KNN</b>   | 15.94           | <0.01          | 11.11                        | 0.06           | 8.93 | 0.04           |
| <b>RPART</b> | 16.66           | <0.01          | 10.59                        | 0.06           | 9.89 | <0.01          |
| <b>RF</b>    | 16.40           | <0.01          | 10.72                        | 0.05           | 9.35 | 0.01           |

KNN, K-nearest neighbors; PLR, penalized logistic regression; PLS, partial least squares; RF, random forests; RMSE, root mean squared error; RPART, recursive partitioning; SVM, support vector machines.
